# Supplementary material for: Prioritization of Biomarker Targets in Human Umbilical Cord Blood: Identification of Proteins in Infant Blood Serving as Validated Biomarkers in Adults
Source: PubMed Central journal article supplement (PMC3346780; doi:10.1289/ehp.1104190), 2012-01-27
Supplement: ehp.1104190.s001.pdf [file ehp.1104190.s001.pdf]

## Supplementary Material

### **Prioritization of Biomarker Targets in Human Umbilical Cord Blood: Identification of Proteins in Infant Blood Serving as Validated Biomarkers in Adults**

Nicole Hansmeier, Tzu-Chiao Chao, Lynn R. Goldman, Frank R. Witter and Rolf U. Halden

#### **Table of contents:**

1. Supplemental Material, Figure 1: p. 2
2. Supplemental Material, Table 1: p. 3-7
3. Supplemental Material, Table 2: p. 8
4. Reference: p. 9

Additional information is available on our homepage

<http://labs.biodesign.asu.edu/halden/publications/>

N. Hansmeier, T.C. Chao, L.R. Goldman, F.R. Witter and R.U. Halden (2012) Prioritization of Biomarker Targets in Human Umbilical Cord Blood: Identification of Proteins in Infant Blood Serving as Validated Biomarkers in Adults. Environ. Health Perspect.

**Full text file contains EHP Appendix 1-4 and MS data files**

and at <http://proteomecommons.org>, project: UCB proteome.

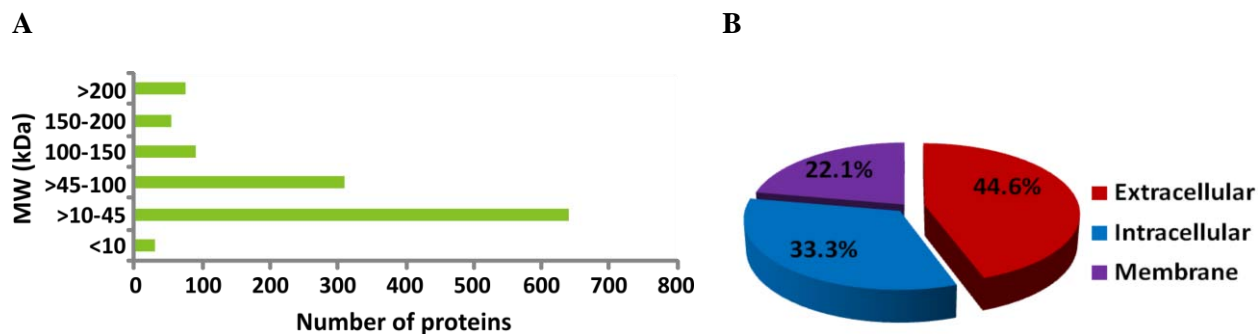

**Supplemental Material, Figure 1.** Characteristics of the UCB proteome.

**A** Histogram showing the molecular weight distribution of the calculated masses of the 1,210 observed UCB proteins calculated with the sequence manipulation suite.

**B** Pie chart showing the classification of UCB proteins according to GO cellular components.

**Supplemental Material, Table 1.** Abbreviated list of the 1,210 identified UCB proteins (extended version is available on our homepage <http://lab.biodesign.asu.edu/halden/publications> & at <http://proteomecommons.org>).

| N  | Accession (GI & Uniprot) |        | N  | Accession (GI & Uniprot) |          | N   | Accession (GI & Uniprot) |        | N   | Accession (GI & Uniprot) |        | N   | Accession (GI & Uniprot) |        | N   | Accession (GI & Uniprot) |        |
|----|--------------------------|--------|----|--------------------------|----------|-----|--------------------------|--------|-----|--------------------------|--------|-----|--------------------------|--------|-----|--------------------------|--------|
| 1  | gi 4502027               | P02768 | 46 | gi 28810                 | P02749   | 91  | gi 62897915              | Q53FV4 | 136 | gi 77379458              |        | 181 | gi 21669653              |        | 226 | gi 62001846              |        |
| 2  | gi 66932947              |        | 47 | gi 119585668             | B7Z545   | 92  | gi 63102951              |        | 137 | gi 90994746              |        | 182 | gi 62089402              | Q59EA3 | 227 | gi 63102995              |        |
| 3  | gi 112911                | P01023 | 48 | gi 88853069              | P04004   | 93  | gi 21707947              | Q68CK4 | 138 | gi 18025702              |        | 183 | gi 84798010              |        | 228 | gi 8101647               |        |
| 4  | gi 115298678             | P01024 | 49 | gi 158254550             | A8K3E4   | 94  | gi 78191798              | P03952 | 139 | gi 12655720              |        | 184 | gi 58222928              |        | 229 | gi 98956182              |        |
| 5  | gi 4557871               | P02787 | 50 | gi 189083780             | P06396   | 95  | gi 22595063              |        | 140 | gi 21669979              |        | 185 | gi 8118083               | O75882 | 230 | gi 58222902              |        |
| 6  | gi 27370813              |        | 51 | gi 34535785              |          | 96  | gi 24430192              | P08779 | 141 | gi 34526063              | P27169 | 186 | gi 21669649              |        | 231 | gi 21669331              |        |
| 7  | gi 15990507              | P01009 | 52 | gi 1197209               | P02763   | 97  | gi 70798701              |        | 142 | gi 408299                | P02656 | 187 | gi 170684604             |        | 232 | gi 112701473             |        |
| 8  | gi 178730                | C0JYY2 | 53 | gi 4504349               | D9YZU5   | 98  | gi 106898223             |        | 143 | gi 4557323               | Q6IB74 | 188 | gi 2077999               | Q65ZC9 | 233 | gi 119596170             |        |
| 9  | gi 2347136               | A2BHY4 | 54 | gi 33451                 | P01871   | 99  | gi 4502163               | P05090 | 144 | gi 48145977              |        | 189 | gi 114147285             |        | 234 | gi 50897468              |        |
| 10 | gi 47132555              | P02751 | 55 | gi 112877                | P02763.1 | 100 | gi 122892088             |        | 145 | gi 62897073              | P15814 | 190 | gi 64654564              | Q4VAI6 | 235 | gi 41019454              |        |
| 11 | gi 77744385              | P08603 | 56 | gi 189066632             | B2R8I2   | 101 | gi 24899162              | Q8IZZ5 | 146 | gi 871345                |        | 191 | gi 118405803             |        | 236 | gi 15637449              |        |
| 12 | gi 34364820              |        | 57 | gi 21669631              |          | 102 | gi 158258685             | A8K9A9 | 147 | gi 95101768              |        | 192 | gi 112694740             |        | 237 | gi 4321595               |        |
| 13 | gi 158255874             | A8K5A4 | 58 | gi 50659080              | P01011   | 103 | gi 114147558             |        | 148 | gi 21669497              | Q8WZ42 | 193 | gi 109693178             |        | 238 | gi 34364639              | Q6N095 |
| 14 | gi 149673887             |        | 59 | gi 18044959              |          | 104 | gi 215982736             |        | 149 | gi 17066105              |        | 194 | gi 109693188             |        | 239 | gi 3413516               | O75636 |
| 15 | gi 119599289             | P00450 | 60 | gi 21669449              |          | 105 | gi 48145933              | P02766 | 150 | gi 119593796             |        | 195 | gi 31076441              |        | 240 | gi 33319550              |        |
| 16 | gi 4557321               | P02647 | 61 | gi 579676                | P02760   | 106 | gi 58372399              | Q5EK51 | 151 | gi 33319616              |        | 196 | gi 47846547              |        | 241 | gi 4378370               |        |
| 17 | gi 455970                | P02774 | 62 | gi 21669327              |          | 107 | gi 39652254              | Q06033 | 152 | gi 114147592             | Q8NFP9 | 197 | gi 21757089              |        | 242 | gi 62204995              |        |
| 18 | gi 189053897             |        | 63 | gi 194375081             | B4DVE1   | 108 | gi 106897586             |        | 153 | gi 62422577              |        | 198 | gi 4502503               | P04003 | 243 | gi 58221960              |        |
| 19 | gi 11321561              | P02790 | 64 | gi 73858568              | P05155   | 109 | gi 2921526               |        | 154 | gi 84798412              |        | 199 | gi 89191868              | P04275 | 244 | gi 41019528              | Q9Y6V0 |
| 20 | gi 70778918              | P19823 | 65 | gi 119395750             | P04264   | 110 | gi 20178323              | P36955 | 155 | gi 112697187             | P13645 | 200 | gi 122892362             |        | 245 | gi 106897477             |        |
| 21 | gi 4505881               | P00747 | 66 | gi 73858566              | P05546   | 111 | gi 93007626              |        | 156 | gi 195972866             | B0YIW2 | 201 | gi 109240688             |        | 246 | gi 150378498             | Q2LD37 |
| 22 | gi 27552515              |        | 67 | gi 37181420              | Q96PD5   | 112 | gi 119763                | P00748 | 157 | gi 167887493             | A8K5J8 | 202 | gi 170684522             |        | 247 | gi 13016667              |        |
| 23 | gi 156231037             | P01042 | 68 | gi 12054078              |          | 113 | gi 28317                 |        | 158 | gi 158256062             | P05160 | 203 | gi 47940520              | Q6IN99 | 248 | gi 6643619               |        |
| 24 | gi 67624831              | P00734 | 69 | gi 21669435              |          | 114 | gi 169205253             |        | 159 | gi 158254552             |        | 204 | gi 112696621             |        | 249 | gi 8250281               |        |
| 25 | gi 189054564             | P02771 | 70 | gi 119573007             | P02652   | 115 | gi 292221                |        | 160 | gi 33319482              |        | 205 | gi 119623150             | P05543 | 250 | gi 4758502               | Q14520 |
| 26 | gi 6715607               | P69892 | 71 | gi 62089238              |          | 116 | gi 6492197               |        | 161 | gi 18025668              | Q6ZP87 | 206 | gi 62898910              | D3DNU8 | 251 | gi 112702678             |        |
| 27 | gi 4501987               | P43652 | 72 | gi 189054178             |          | 117 | gi 62896541              | Q53HT9 | 162 | gi 34526391              | Q96L91 | 207 | gi 77379426              |        | 252 | gi 34530413              | Q6UXB8 |
| 28 | gi 93163358              | P06727 | 73 | gi 42716297              | P10909   | 118 | gi 51173528              | P22792 | 163 | gi 56549696              | P04053 | 208 | gi 114386092             |        | 253 | gi 3337391               | P00739 |
| 29 | gi 156523970             | P02765 | 74 | gi 62089410              | Q59E99   | 119 | gi 75707225              |        | 164 | gi 63054852              |        | 209 | gi 119626079             |        | 254 | gi 4323912               |        |
| 30 | gi 34365089              | Q6MZX7 | 75 | gi 21669425              |          | 120 | gi 8777875               |        | 165 | gi 481341                |        | 210 | gi 119626104             |        | 255 | gi 32480766              | Q149N8 |
| 31 | gi 194376340             |        | 76 | gi 34534305              |          | 121 | gi 194388850             | B4DRY0 | 166 | gi 33319552              |        | 211 | gi 12054074              |        | 256 | gi 112696203             |        |
| 32 | gi 189053442             | B2R6W1 | 77 | gi 215982760             |          | 122 | gi 4502495               | P09871 | 167 | gi 95007517              | B2R5G8 | 212 | gi 121488433             |        | 257 | gi 2058536               |        |
| 33 | gi 45580688              | P10643 | 78 | gi 119631418             | D3DPG0   | 123 | gi 21669671              |        | 168 | gi 189053309             | B2R5G8 | 213 | gi 130381779             |        | 258 | gi 34527235              |        |
| 34 | gi 119610986             | P08697 | 79 | gi 62861016              |          | 124 | gi 118406110             |        | 169 | gi 18496799              |        | 214 | gi 156627579             | P05452 | 259 | gi 156076800             |        |
| 35 | gi 189069199             | P01008 | 80 | gi 194387702             | B4DRF2   | 125 | gi 587420                |        | 170 | gi 87299000              |        | 215 | gi 183763                | Q03591 | 260 | gi 1118905               |        |
| 36 | gi 194384366             | B4E1Z4 | 81 | gi 17939658              |          | 126 | gi 1200069               |        | 171 | gi 4757760               | Q15848 | 216 | gi 197115843             |        | 261 | gi 45935385              | O94885 |
| 37 | gi 46577680              | P04217 | 82 | gi 38488662              | P13671   | 127 | gi 14289024              | O95445 | 172 | gi 156633078             |        | 217 | gi 21669323              |        | 262 | gi 28590                 |        |
| 38 | gi 33989                 |        | 83 | gi 158256710             | P07996   | 128 | gi 6841322               |        | 173 | gi 119609221             |        | 218 | gi 218512079             | P01859 | 263 | gi 29725624              | Q86Y22 |
| 39 | gi 178853                | P02649 | 84 | gi 4262117               |          | 129 | gi 3327990               |        | 174 | gi 112701253             |        | 219 | gi 33126535              | Q7Z5F4 | 264 | gi 18092618              |        |
| 40 | gi 62089124              | Q59EP2 | 85 | gi 38016947              | P01031   | 130 | gi 21669651              |        | 175 | gi 1071953               |        | 220 | gi 4502157               | P02654 | 265 | gi 2687853               | Q92878 |
| 41 | gi 156119625             | P19827 | 86 | gi 55743122              | P02753   | 131 | gi 284238                |        | 176 | gi 39794308              |        | 221 | gi 4503107               | P01034 | 266 | gi 3091192               |        |
| 42 | gi 4503689               | P02671 | 87 | gi 80975643              |          | 132 | gi 112694411             |        | 177 | gi 119617033             |        | 222 | gi 4586460               | Q8NHU6 | 267 | gi 74146374              |        |
| 43 | gi 1483187               | Q14624 | 88 | gi 55663330              | Q5VY30   | 133 | gi 119598461             |        | 178 | gi 170684498             |        | 223 | gi 46253810              |        | 268 | gi 215274225             | Q5VST9 |
| 44 | gi 13650074              | P69905 | 89 | gi 3540267               |          | 134 | gi 21669073              |        | 179 | gi 28375497              | P29622 | 224 | gi 58221677              |        | 269 | gi 30841934              |        |
| 45 | gi 141596                | P25311 | 90 | gi 106575                |          | 135 | gi 75707613              |        | 180 | gi 86793109              | P17927 | 225 | gi 58223260              |        | 270 | gi 58202736              |        |

|     |              |        |     |              |        |     |              |        |     |              |        |     |              |        |     |              |        |
|-----|--------------|--------|-----|--------------|--------|-----|--------------|--------|-----|--------------|--------|-----|--------------|--------|-----|--------------|--------|
| 271 | gi 6855601   |        | 320 | gi 58222078  |        | 369 | gi 71891693  | P98196 | 418 | gi 791049    | P50440 | 467 | gi 119626065 |        | 516 | gi 119627049 | P07357 |
| 272 | gi 56550039  | Q03164 | 321 | gi 62420884  | Q16832 | 370 | gi 217272887 | Q8IWG1 | 419 | gi 169164581 |        | 468 | gi 1407576   |        | 517 | gi 119627051 |        |
| 273 | gi 681900    |        | 322 | gi 73747879  | Q9Y4E6 | 371 | gi 21757082  |        | 420 | gi 21928510  | Q8TDU9 | 469 | gi 14993776  | Q9H1R3 | 518 | gi 119631978 |        |
| 274 | gi 50897852  | Q3V6T2 | 323 | gi 55957538  | P51587 | 372 | gi 42760220  |        | 421 | gi 31415703  | P07225 | 470 | gi 156547039 | Q9UK11 | 519 | gi 11992190  |        |
| 275 | gi 197115805 |        | 324 | gi 46812315  |        | 373 | gi 998395    |        | 422 | gi 34364645  | Q6N092 | 471 | gi 17864094  | Q96JP0 | 520 | gi 1235783   |        |
| 276 | gi 62871248  |        | 325 | gi 66346676  | Q96RL7 | 374 | gi 14268412  |        | 423 | gi 57222563  | Q14008 | 472 | gi 18041722  |        | 521 | gi 125758    | P01594 |
| 277 | gi 4557691   | P23276 | 326 | gi 83305339  | P11309 | 375 | gi 42760062  |        | 424 | gi 62897507  | Q53GF8 | 473 | gi 189053992 | B2R9F2 | 522 | gi 12733974  |        |
| 278 | gi 84627489  |        | 327 | gi 3142554   |        | 376 | gi 58223262  |        | 425 | gi 74146657  |        | 474 | gi 189054394 | B2RAM6 | 523 | gi 1292863   |        |
| 279 | gi 90823191  |        | 328 | gi 33319606  |        | 377 | gi 75707177  |        | 426 | gi 74749396  |        | 475 | gi 20379790  | Q9Y5P3 | 524 | gi 1335383   |        |
| 280 | gi 62088774  | P02452 | 329 | gi 21753436  | Q8N919 | 378 | gi 149773468 | Q09MP3 | 427 | gi 92091575  | Q2TAC2 | 476 | gi 2114253   | Q5NV68 | 525 | gi 14043615  |        |
| 281 | gi 422908    | Q5NV65 | 330 | gi 23683338  |        | 379 | gi 4507353   | Q92804 | 428 | gi 110626504 |        | 477 | gi 21669349  |        | 526 | gi 145942180 |        |
| 282 | gi 58202700  |        | 331 | gi 119578374 | P02458 | 380 | gi 5051630   | Q9Y6L6 | 429 | gi 112699712 |        | 478 | gi 21669395  |        | 527 | gi 146336933 | B1N7B8 |
| 283 | gi 40388586  |        | 332 | gi 2735715   | P08123 | 381 | gi 111917725 |        | 430 | gi 114385755 |        | 479 | gi 21669495  |        | 528 | gi 152941042 |        |
| 284 | gi 7021531   | Q9UQD0 | 333 | gi 6330422   | Q9ULL8 | 382 | gi 119588367 | D3DQR0 | 431 | gi 118406148 |        | 480 | gi 22209001  | Q96MW7 | 529 | gi 153792678 |        |
| 285 | gi 106897896 |        | 334 | gi 4566035   |        | 383 | gi 126539    | P01700 | 432 | gi 119601973 | P08185 | 481 | gi 27348189  | Q8IXE7 | 530 | gi 15723003  |        |
| 286 | gi 3170943   |        | 335 | gi 47846623  |        | 384 | gi 145942614 |        | 433 | gi 121941229 | Q2KHM7 | 482 | gi 3091196   |        | 531 | gi 16117138  |        |
| 287 | gi 58223162  |        | 336 | gi 5802814   |        | 385 | gi 170684552 |        | 434 | gi 13376611  | Q9H7S9 | 483 | gi 33319340  |        | 532 | gi 169197971 |        |
| 288 | gi 34101286  | Q96KR1 | 337 | gi 84028237  | Q9HB19 | 386 | gi 2852417   |        | 435 | gi 151302818 |        | 484 | gi 37777990  |        | 533 | gi 169206310 |        |
| 289 | gi 62898904  | Q53EQ3 | 338 | gi 31657092  | Q86UQ4 | 387 | gi 3091180   |        | 436 | gi 169169902 |        | 485 | gi 425518    |        | 534 | gi 170684398 |        |
| 290 | gi 119583644 | Q92794 | 339 | gi 112695210 |        | 388 | gi 41019505  | Q04637 | 437 | gi 17226636  |        | 486 | gi 4572474   | Q9Y250 | 535 | gi 170684402 |        |
| 291 | gi 13431717  | Q9UKX3 | 340 | gi 62897345  | Q53GN8 | 389 | gi 55957709  | B1ALS2 | 438 | gi 197115849 |        | 487 | gi 47271320  |        | 536 | gi 170684452 |        |
| 292 | gi 18496791  |        | 341 | gi 70798532  |        | 390 | gi 57863250  |        | 439 | gi 20521668  | Q96T49 | 488 | gi 49257462  | Q6GMX3 | 537 | gi 170684546 |        |
| 293 | gi 86438950  |        | 342 | gi 119583895 | Q9NQ78 | 391 | gi 66840148  |        | 440 | gi 27261743  |        | 489 | gi 51103397  |        | 538 | gi 171853445 |        |
| 294 | gi 112696257 |        | 343 | gi 46254071  |        | 392 | gi 18025706  |        | 441 | gi 34527413  |        | 490 | gi 56117850  | O75534 | 539 | gi 17226648  |        |
| 295 | gi 119610295 |        | 344 | gi 51259604  |        | 393 | gi 24308336  | Q5TGI0 | 442 | gi 37777986  |        | 491 | gi 58222796  |        | 540 | gi 1813658   |        |
| 296 | gi 9663172   |        | 345 | gi 77158045  |        | 394 | gi 2995691   |        | 443 | gi 41152097  | Q02040 | 492 | gi 62089156  | Q59EM6 | 541 | gi 182639267 | Q99797 |
| 297 | gi 194391112 | B4DPR2 | 346 | gi 80975617  |        | 395 | gi 33319586  |        | 444 | gi 52545843  | Q9Y597 | 493 | gi 62861003  |        | 542 | gi 1834497   |        |
| 298 | gi 55962671  | Q5SQ11 | 347 | gi 21669319  |        | 396 | gi 70798534  |        | 445 | gi 5578790   |        | 494 | gi 84040294  | Q14690 | 543 | gi 18698417  |        |
| 299 | gi 9295281   |        | 348 | gi 58222530  |        | 397 | gi 91206450  |        | 446 | gi 62898962  | Q15542 | 495 | gi 98956058  |        | 544 | gi 190358761 | A4D997 |
| 300 | gi 106899620 |        | 349 | gi 5921617   | Q9UL82 | 398 | gi 91979418  |        | 447 | gi 6643219   |        | 496 | gi 98956324  |        | 545 | gi 19055799  |        |
| 301 | gi 29837086  |        | 350 | gi 112698094 |        | 399 | gi 194385816 |        | 448 | gi 68533041  | Q567U6 | 497 | gi 1071952   |        | 546 | gi 194384564 | B4DL80 |
| 302 | gi 33318888  |        | 351 | gi 169203189 |        | 400 | gi 34364635  | Q6N097 | 449 | gi 7657554   | Q9UK85 | 498 | gi 109693283 | Q0ZC18 | 547 | gi 197115583 |        |
| 303 | gi 5419721   |        | 352 | gi 21707884  |        | 401 | gi 37747855  |        | 450 | gi 81175178  | P35527 | 499 | gi 112694210 |        | 548 | gi 21217667  | Q8IWT0 |
| 304 | gi 63054858  | A6NED2 | 353 | gi 34364807  | Q6N030 | 402 | gi 90823187  |        | 451 | gi 112700674 |        | 500 | gi 112701219 |        | 549 | gi 21310450  |        |
| 305 | gi 157427661 | Q8N944 | 354 | gi 93007497  |        | 403 | gi 125815    | P06311 | 452 | gi 122892354 |        | 501 | gi 114147463 |        | 550 | gi 21362050  | Q96NT0 |
| 306 | gi 40788905  | Q92598 | 355 | gi 112700291 |        | 404 | gi 1673595   |        | 453 | gi 14589193  |        | 502 | gi 114147640 |        | 551 | gi 215982746 |        |
| 307 | gi 46094081  | Q9ULH1 | 356 | gi 171854335 |        | 405 | gi 51593790  |        | 454 | gi 14602658  |        | 503 | gi 114385588 |        | 552 | gi 21619606  | Q6PIL8 |
| 308 | gi 46253780  |        | 357 | gi 33319634  |        | 406 | gi 74738655  |        | 455 | gi 146330486 |        | 504 | gi 114385734 |        | 553 | gi 21668668  |        |
| 309 | gi 116249459 |        | 358 | gi 35825     | P20742 | 407 | gi 8927581   | O75526 | 456 | gi 15080499  |        | 505 | gi 114385805 |        | 554 | gi 21669539  |        |
| 310 | gi 58222068  |        | 359 | gi 453155    |        | 408 | gi 10334595  |        | 457 | gi 197115573 |        | 506 | gi 118405869 |        | 555 | gi 21998831  |        |
| 311 | gi 112696057 |        | 360 | gi 4103667   |        | 409 | gi 112700812 |        | 458 | gi 21620096  | Q8N518 | 507 | gi 118406312 |        | 556 | gi 22095259  |        |
| 312 | gi 194383688 | B4DKJ0 | 361 | gi 62531288  | Q562E5 | 410 | gi 123859    | P01780 | 459 | gi 22749359  | Q9Y2I7 | 508 | gi 118406366 |        | 557 | gi 23194491  |        |
| 313 | gi 47154912  |        | 362 | gi 21751926  | Q32P44 | 411 | gi 158420731 | Q12873 | 460 | gi 34526178  |        | 509 | gi 119571049 |        | 558 | gi 2385496   | A2IP15 |
| 314 | gi 112701089 |        | 363 | gi 2765421   |        | 412 | gi 21361959  | Q8WV83 | 461 | gi 4503625   | P00742 | 510 | gi 119573478 |        | 559 | gi 2565063   | Q9BT09 |
| 315 | gi 116292750 | P08519 | 364 | gi 28273130  | Q86YV0 | 413 | gi 3093902   |        | 462 | gi 55960308  | Q96M02 | 511 | gi 119584064 | Q8N163 | 560 | gi 29649727  | Q86W19 |
| 316 | gi 415821    | P46013 | 365 | gi 40788229  | Q13615 | 414 | gi 33318924  |        | 463 | gi 58222833  |        | 512 | gi 119607575 | Q86Y56 | 561 | gi 30173473  | Q96T25 |
| 317 | gi 18025666  |        | 366 | gi 4324078   |        | 415 | gi 3980130   | Q9NSD0 | 464 | gi 6013427   |        | 513 | gi 119617920 |        | 562 | gi 30722448  | Q86T24 |
| 318 | gi 18025646  |        | 367 | gi 57864582  | Q86YZ3 | 416 | gi 39938169  |        | 465 | gi 94574438  | Q1JQ81 | 514 | gi 119622859 |        | 563 | gi 30841940  |        |
| 319 | gi 3273353   |        | 368 | gi 58221609  |        | 417 | gi 70798697  |        | 466 | gi 112695007 |        | 515 | gi 119623046 |        | 564 | gi 3093872   |        |

|     |             |        |     |              |        |     |              |        |     |              |        |     |              |        |     |              |        |
|-----|-------------|--------|-----|--------------|--------|-----|--------------|--------|-----|--------------|--------|-----|--------------|--------|-----|--------------|--------|
| 565 | gi 31337686 |        | 614 | gi 576554    |        | 663 | gi 7020538   | Q53EW4 | 712 | gi 190410954 | A8MYB1 | 761 | gi 33569996  |        | 810 | gi 85542144  | Q562F6 |
| 566 | gi 31377611 |        | 615 | gi 58222425  |        | 664 | gi 50513245  | Q13111 | 713 | gi 193786724 | B3KQI5 | 762 | gi 41393547  | A2RRP1 | 811 | gi 33354053  | A4LAA3 |
| 567 | gi 3142600  |        | 616 | gi 58222604  |        | 665 | gi 486879    |        | 714 | gi 194376932 | B4DWG5 | 763 | gi 11121491  |        | 812 | gi 37780053  | Q2TV78 |
| 568 | gi 31542733 | Q8N2U9 | 617 | gi 58223154  |        | 666 | gi 17223624  | Q8IUA7 | 715 | gi 19773365  |        | 764 | gi 115511046 | O95789 | 813 | gi 194385282 | B4E256 |
| 569 | gi 32440849 | Q2Z197 | 618 | gi 587249    |        | 667 | gi 39794204  | Q5VV67 | 716 | gi 21928977  | Q8NGF2 | 765 | gi 169216868 |        | 814 | gi 47154910  |        |
| 570 | gi 33235632 |        | 619 | gi 6179862   |        | 668 | gi 118764321 | P82987 | 717 | gi 31338739  |        | 766 | gi 189053887 | B2R8F9 | 815 | gi 194379064 | B4DHC2 |
| 571 | gi 33319140 |        | 620 | gi 6179870   |        | 669 | gi 37694647  |        | 718 | gi 39938022  |        | 767 | gi 50949507  | Q69YJ7 | 816 | gi 47939097  | Q6IQ08 |
| 572 | gi 33319290 |        | 621 | gi 62088088  | P02786 | 670 | gi 52317182  | Q8NGN2 | 719 | gi 4261843   |        | 768 | gi 119607051 |        | 817 | gi 5453810   | O00634 |
| 573 | gi 33319342 |        | 622 | gi 62113341  | Q56G89 | 671 | gi 1526978   | Q92736 | 720 | gi 438069    | P32119 | 769 | gi 15530238  | Q9H9L4 | 818 | gi 112695992 |        |
| 574 | gi 33319510 |        | 623 | gi 62720451  |        | 672 | gi 5326898   | Q9Y5B0 | 721 | gi 4506325   | Q15256 | 770 | gi 16550719  |        | 819 | gi 114386054 |        |
| 575 | gi 33319544 |        | 624 | gi 62822092  |        | 673 | gi 54633198  | P10586 | 722 | gi 46397468  | Q14533 | 771 | gi 21669417  |        | 820 | gi 119580386 | A8K8P3 |
| 576 | gi 33319576 |        | 625 | gi 62860986  |        | 674 | gi 55662488  | Q5VZ84 | 723 | gi 51103413  |        | 772 | gi 266666    | P30531 | 821 | gi 194379192 | B4DHI5 |
| 577 | gi 33570097 |        | 626 | gi 62861025  |        | 675 | gi 119591496 | Q86XH1 | 724 | gi 56204710  | Q9NZB8 | 773 | gi 34303926  | Q7L3T8 | 822 | gi 45243534  | Q9HC56 |
| 578 | gi 34526220 |        | 627 | gi 62897339  | Q53GP1 | 676 | gi 18089152  | Q9Y295 | 725 | gi 57242761  | Q13546 | 774 | gi 587305    |        | 823 | gi 46411193  | Q2TU65 |
| 579 | gi 3608459  |        | 628 | gi 63103065  |        | 677 | gi 55743104  |        | 726 | gi 587267    |        | 775 | gi 6642738   | Q9H8H3 | 824 | gi 4837755   |        |
| 580 | gi 3721651  |        | 629 | gi 64654113  | Q92832 | 678 | gi 119600834 |        | 727 | gi 62088564  | Q59FG8 | 776 | gi 66529294  | Q15165 | 825 | gi 50949980  | O75153 |
| 581 | gi 3954956  |        | 630 | gi 6643391   |        | 679 | gi 119629733 |        | 728 | gi 62897057  | Q99933 | 777 | gi 7019933   | Q9NXS9 | 826 | gi 62089272  | Q59EG8 |
| 582 | gi 39930571 | Q8IYG6 | 631 | gi 66821507  |        | 680 | gi 57208525  | B3KTY4 | 729 | gi 67514036  | Q5JPT5 | 778 | gi 10439721  | Q9H5R7 | 827 | gi 112696443 |        |
| 583 | gi 39938092 |        | 632 | gi 66821561  |        | 681 | gi 62089310  | Q59EE9 | 730 | gi 70798576  |        | 779 | gi 106897473 |        | 828 | gi 11493431  | Q9H3B0 |
| 584 | gi 39938127 |        | 633 | gi 70798688  |        | 682 | gi 112695358 |        | 731 | gi 75707569  |        | 780 | gi 112699453 |        | 829 | gi 119591050 | Q96BH1 |
| 585 | gi 39938204 |        | 634 | gi 70798801  |        | 683 | gi 119623194 |        | 732 | gi 7702778   | P59666 | 781 | gi 112701481 |        | 830 | gi 119614919 |        |
| 586 | gi 40807038 | Q6P163 | 635 | gi 70888243  |        | 684 | gi 28269794  | Q96PQ8 | 733 | gi 8118530   | Q9Y371 | 782 | gi 11612390  | Q9H2S9 | 831 | gi 119622987 |        |
| 587 | gi 4321847  |        | 636 | gi 74147093  |        | 685 | gi 6635135   | Q8N6R0 | 734 | gi 89477404  | Q1A5X7 | 783 | gi 119597150 | B3KSQ0 | 832 | gi 169169217 |        |
| 588 | gi 4323179  |        | 637 | gi 75707473  |        | 686 | gi 169202103 |        | 735 | gi 169212806 |        | 784 | gi 14716960  |        | 833 | gi 2306828   |        |
| 589 | gi 4378388  |        | 638 | gi 76252629  |        | 687 | gi 36029914  | Q96JH7 | 736 | gi 68533111  | Q4LE43 | 785 | gi 16751921  | P81605 | 834 | gi 28637     | Q13747 |
| 590 | gi 4503011  | P15169 | 639 | gi 77378306  |        | 688 | gi 76789661  | Q9UL68 | 737 | gi 98956178  |        | 786 | gi 169165187 |        | 835 | gi 33319050  |        |
| 591 | gi 4505735  | P10720 | 640 | gi 77379751  |        | 689 | gi 8810056   |        | 738 | gi 12585192  | Q9NR09 | 787 | gi 169167744 |        | 836 | gi 33868637  |        |
| 592 | gi 4505949  | P01189 | 641 | gi 7959791   |        | 690 | gi 10439979  | Q9Y2T2 | 739 | gi 6469374   | Q9NY15 | 788 | gi 170684480 |        | 837 | gi 38372737  | Q8NGN7 |
| 593 | gi 45439365 | Q14CX5 | 642 | gi 80975581  |        | 691 | gi 194385510 | B4E2H0 | 740 | gi 106640    |        | 789 | gi 194381382 | Q8N4V1 | 838 | gi 55957576  | Q8TC20 |
| 594 | gi 460857   |        | 643 | gi 83405168  | Q2TAM5 | 692 | gi 4505541   | O60763 | 741 | gi 27348193  | Q8IXE5 | 790 | gi 31337528  |        | 839 | gi 58198523  |        |
| 595 | gi 46254012 |        | 644 | gi 9295291   |        | 693 | gi 58257654  | Q5T2D3 | 742 | gi 50355941  | Q86SQ4 | 791 | gi 3142454   |        | 840 | gi 6330847   | Q9UN36 |
| 596 | gi 47846717 |        | 645 | gi 98956018  |        | 694 | gi 169218213 |        | 743 | gi 71296783  | Q49AP2 | 792 | gi 42760084  |        | 841 | gi 7023653   | Q9BZD2 |
| 597 | gi 480866   |        | 646 | gi 98956342  |        | 695 | gi 18203332  | Q9NZN3 | 744 | gi 84798160  |        | 793 | gi 4503109   | P01036 | 842 | gi 7959193   | Q9P262 |
| 598 | gi 480919   |        | 647 | gi 119592748 |        | 696 | gi 194379290 | B4DY49 | 745 | gi 194374471 | B4DEM0 | 794 | gi 51949939  |        | 843 | gi 82792219  | Q2VCE3 |
| 599 | gi 481342   |        | 648 | gi 15277841  | Q9NP71 | 697 | gi 4826762   | P00738 | 746 | gi 8886722   | Q9NRR4 | 795 | gi 52317094  | Q8IXE1 | 844 | gi 89242141  | Q96DM3 |
| 600 | gi 49065410 | Q6FID4 | 649 | gi 169163482 |        | 698 | gi 73760405  | P42167 | 747 | gi 4758416   | Q92538 | 796 | gi 6649884   |        | 845 | gi 98956298  |        |
| 601 | gi 49523902 |        | 650 | gi 169217275 |        | 699 | gi 112696917 |        | 748 | gi 68051186  | Q4R9M7 | 797 | gi 66932890  |        | 846 | gi 16974104  |        |
| 602 | gi 5051143  |        | 651 | gi 7022973   | Q8WWK9 | 700 | gi 113205085 | Q6UY01 | 749 | gi 94721336  | Q96T51 | 798 | gi 68533117  | Q4LE40 | 847 | gi 4098868   | Q9UQB3 |
| 603 | gi 5081713  |        | 652 | gi 189066649 | Q96P44 | 701 | gi 114385630 |        | 750 | gi 119597857 | Q9UESA | 799 | gi 71297396  | Q499Z2 | 848 | gi 15777233  |        |
| 604 | gi 51095056 | A4D112 | 653 | gi 9663254   |        | 702 | gi 118406112 |        | 751 | gi 14165419  | Q9UN72 | 800 | gi 73760409  | P10646 | 849 | gi 21670677  |        |
| 605 | gi 51103541 |        | 654 | gi 194386662 | B4DR29 | 703 | gi 119588117 |        | 752 | gi 90101808  | P11171 | 801 | gi 7657647   | Q9NZR1 | 850 | gi 119605583 |        |
| 606 | gi 51490957 |        | 655 | gi 189046909 | A1L4H1 | 704 | gi 119624788 |        | 753 | gi 52545703  | Q9BXF3 | 802 | gi 81174549  | Q7Z4H9 | 851 | gi 21706895  |        |
| 607 | gi 54038911 |        | 656 | gi 194383506 | B4E1B2 | 705 | gi 119625347 | Q6V1P9 | 754 | gi 71891685  | Q86VP6 | 803 | gi 98956256  |        | 852 | gi 28912912  | Q9C056 |
| 608 | gi 54781103 |        | 657 | gi 1008070   |        | 706 | gi 12054076  |        | 755 | gi 46249406  |        | 804 | gi 98956415  |        | 853 | gi 49257892  | Q6GMV7 |
| 609 | gi 5578810  |        | 658 | gi 119578529 | Q96GM5 | 707 | gi 121942687 | Q3LI62 | 756 | gi 7243169   | A5YM72 | 805 | gi 21669475  |        | 854 | gi 55957320  | Q76FK4 |
| 610 | gi 55859590 | Q96IY4 | 659 | gi 22761758  | Q17RM4 | 708 | gi 12750761  |        | 757 | gi 119620894 | B3KV89 | 806 | gi 28278130  | Q86XF2 | 855 | gi 5689776   | Q9UMQ6 |
| 611 | gi 55957432 | Q5JVP3 | 660 | gi 57864228  | Q92952 | 709 | gi 13376439  | Q9HAC8 | 758 | gi 40846989  | Q6RR68 | 807 | gi 31335203  |        | 856 | gi 62898976  | Q8IU81 |
| 612 | gi 56204877 | Q5TB12 | 661 | gi 8843933   | Q9NRR5 | 710 | gi 145942603 |        | 759 | gi 118150678 | Q008S8 | 808 | gi 62087782  | Q59GK8 | 857 | gi 65507253  |        |
| 613 | gi 57208830 | Q5JVE8 | 662 | gi 154090979 | Q9ULL0 | 711 | gi 169213473 |        | 760 | gi 194374401 | B4DEI5 | 809 | gi 64464726  | Q14678 | 858 | gi 7020071   | Q8IUZ0 |

|     |              |        |     |  |        |      |  |        |      |  |        |      |  |        |      |  |        |
|-----|--------------|--------|-----|--|--------|------|--|--------|------|--|--------|------|--|--------|------|--|--------|
| 859 | gi 77158065  |        | 908 |  | P23083 | 957  |  | Q9NYF0 | 1006 |  | Q8IXB1 | 1055 |  | P78426 | 1104 |  | A6NNW6 |
| 860 | gi 118425776 |        | 909 |  | P01714 | 958  |  | Q95714 | 1007 |  | P06681 | 1056 |  | P83593 | 1105 |  | O43613 |
| 861 | gi 119575152 |        | 910 |  | P01771 | 959  |  | P01768 | 1008 |  | Q12860 | 1057 |  | Q0P6D2 | 1106 |  | O43763 |
| 862 | gi 119617692 |        | 911 |  | P04259 | 960  |  | Q94833 | 1009 |  | O95071 | 1058 |  | Q12766 | 1107 |  | O95453 |
| 863 | gi 14210488  | Q9BTE1 | 912 |  | P06316 | 961  |  | Q9UKG1 | 1010 |  | P02788 | 1059 |  | Q13574 | 1108 |  | P04211 |
| 864 | gi 189041198 | Q5T699 | 913 |  | P48668 | 962  |  | Q9BTC0 | 1011 |  | P04434 | 1060 |  | Q14914 | 1109 |  | P04438 |
| 865 | gi 189054552 |        | 914 |  | P01613 | 963  |  | A6NCL2 | 1012 |  | P24043 | 1061 |  | Q4G0U5 | 1110 |  | P21283 |
| 866 | gi 22748713  | Q96BM1 | 915 |  | P01765 | 964  |  | P01769 | 1013 |  | P49366 | 1062 |  | Q6UXN2 | 1111 |  | P30260 |
| 867 | gi 338733    |        | 916 |  | P02750 | 965  |  | Q5JSZ5 | 1014 |  | Q13144 | 1063 |  | Q6ZTN6 | 1112 |  | Q15131 |
| 868 | gi 4506577   | P35398 | 917 |  | P06309 | 966  |  | Q9ULL1 | 1015 |  | Q4VC44 | 1064 |  | Q7L0R7 | 1113 |  | Q16620 |
| 869 | gi 542885    |        | 918 |  | P19652 | 967  |  | P01709 | 1016 |  | Q7Z4L5 | 1065 |  | Q8WWC4 | 1114 |  | Q3L173 |
| 870 | gi 58223072  |        | 919 |  | P23142 | 968  |  | P01760 | 1017 |  | Q9Y238 | 1066 |  | Q9BSK4 | 1115 |  | Q460N5 |
| 871 | gi 62897259  | Q53GT1 | 920 |  | P51884 | 969  |  | P20929 | 1018 |  | Q9H2G4 | 1067 |  | Q9GZU7 | 1116 |  | Q5VVJ2 |
| 872 | gi 6760045   | Q9H320 | 921 |  | P69891 | 970  |  | P58107 | 1019 |  | Q9UDX5 | 1068 |  | Q9H079 | 1117 |  | Q6P2C8 |
| 873 | gi 70798113  |        | 922 |  | P01602 | 971  |  | Q9Y4D7 | 1020 |  | O15234 | 1069 |  | Q9UHQ7 | 1118 |  | Q86YR7 |
| 874 |              | P01857 | 923 |  | P01824 | 972  |  | P01615 | 1021 |  | P48549 | 1070 |  | Q9Y5F1 | 1119 |  | Q8IU85 |
| 875 |              | POCOL5 | 924 |  | P01825 | 973  |  | P04209 | 1022 |  | P80421 | 1071 |  | Q9BV73 | 1120 |  | Q8WV41 |
| 876 |              | P04114 | 925 |  | P06326 | 974  |  | Q05707 | 1023 |  | Q9BXT4 | 1072 |  | Q8IVF4 | 1121 |  | Q92766 |
| 877 |              | P01834 | 926 |  | P01625 | 975  |  | Q14151 | 1024 |  | Q96J65 | 1073 |  | Q00975 | 1122 |  | Q96SE7 |
| 878 |              | POCOL4 | 927 |  | P01716 | 976  |  | Q07869 | 1025 |  | O75159 | 1074 |  | Q9UBZ9 | 1123 |  | Q9H074 |
| 879 |              | P01842 | 928 |  | P01617 | 977  |  | Q9BYW2 | 1026 |  | P01699 | 1075 |  | Q5VUJ6 | 1124 |  | Q9NTZ6 |
| 880 |              | P00751 | 929 |  | P04430 | 978  |  | P01767 | 1027 |  | P29375 | 1076 |  | Q5T9A4 | 1125 |  | Q9NVH1 |
| 881 |              | P01860 | 930 |  | P35542 | 979  |  | Q8NE71 | 1028 |  | P56179 | 1077 |  | Q15596 | 1126 |  | Q9UKN7 |
| 882 |              | P01620 | 931 |  | P01622 | 980  |  | P01612 | 1029 |  | P82979 | 1078 |  | Q6P0Q8 | 1127 |  | Q9UPX8 |
| 883 |              | P04206 | 932 |  | P06310 | 981  |  | Q86VF7 | 1030 |  | Q01101 | 1079 |  | Q92771 | 1128 |  | Q9Y5J6 |
| 884 |              | P18136 | 933 |  | P80419 | 982  |  | Q95785 | 1031 |  | Q16352 | 1080 |  | Q9HCK8 | 1129 |  | P52746 |
| 885 |              | P01764 | 934 |  | P33151 | 983  |  | Q17RD7 | 1032 |  | Q5MIZ7 | 1081 |  | Q6PKG0 | 1130 |  | Q8IXT5 |
| 886 |              | P01861 | 935 |  | P26927 | 984  |  | A6NE01 | 1033 |  | Q86Z23 | 1082 |  | Q9GZR1 | 1131 |  | O43298 |
| 887 |              | P01019 | 936 |  | P01770 | 985  |  | P00395 | 1034 |  | Q8N3Y3 | 1083 |  | Q4G0P3 | 1132 |  | Q96L96 |
| 888 |              | P01614 | 937 |  | P01621 | 986  |  | P01777 | 1035 |  | Q9HCD5 | 1084 |  | Q92581 | 1133 |  | Q8TBZ5 |
| 889 |              | P68871 | 938 |  | Q96NX5 | 987  |  | P02776 | 1036 |  | Q9UHQ9 | 1085 |  | Q9P296 | 1134 |  | Q5JSJ4 |
| 890 |              | P04196 | 939 |  | P01773 | 988  |  | P63128 | 1037 |  | Q9UN76 | 1086 |  | Q9UI47 | 1135 |  | Q8NG97 |
| 891 |              | P06314 | 940 |  | P01719 | 989  |  | Q69YH5 | 1038 |  | O15481 | 1087 |  | Q2M3M2 | 1136 |  | Q6NSI4 |
| 892 |              | Q08380 | 941 |  | P01593 | 990  |  | Q9NXA8 | 1039 |  | P01598 | 1088 |  | Q68DA7 | 1137 |  | P80192 |
| 893 |              | P80748 | 942 |  | P01619 | 991  |  | P23193 | 1040 |  | P01605 | 1089 |  | Q9BZK7 | 1138 |  | Q9BZL4 |
| 894 |              | P04207 | 943 |  | P01703 | 992  |  | Q9NW08 | 1041 |  | P01611 | 1090 |  | O95425 | 1139 |  | O95359 |
| 895 |              | P06312 | 944 |  | P01708 | 993  |  | Q6P2P2 | 1042 |  | P01701 | 1091 |  | P78332 | 1140 |  | Q8TD84 |
| 896 |              | P01772 | 945 |  | P02655 | 994  |  | Q5BJE1 | 1043 |  | P01721 | 1092 |  | P98198 | 1141 |  | Q9UGM6 |
| 897 |              | P02775 | 946 |  | P06319 | 995  |  | Q8IYA6 | 1044 |  | P01775 | 1093 |  | Q8NDH2 | 1142 |  | O14531 |
| 898 |              | P04433 | 947 |  | P01624 | 996  |  | Q9Y6K5 | 1045 |  | P01779 | 1094 |  | A6H8Y1 | 1143 |  | P38435 |
| 899 |              | P01608 | 948 |  | P06887 | 997  |  | P25940 | 1046 |  | P02545 | 1095 |  | Q9H0B6 | 1144 |  | Q92794 |
| 900 |              | P01717 | 949 |  | P00736 | 998  |  | Q8TEK3 | 1047 |  | P06317 | 1096 |  | B2RTY4 | 1145 |  | Q9NX07 |
| 901 |              | P01781 | 950 |  | Q02224 | 999  |  | P23467 | 1048 |  | P06318 | 1097 |  | O15018 | 1146 |  | A6NCL4 |
| 902 |              | P01766 | 951 |  | P01704 | 1000 |  | Q5TAX3 | 1049 |  | P06889 | 1098 |  | P51857 | 1147 |  | B1ANY3 |
| 903 |              | P04208 | 952 |  | P41222 | 1001 |  | O15027 | 1050 |  | P07196 | 1099 |  | Q13148 | 1148 |  | P48048 |
| 904 |              | P05156 | 953 |  | Q15751 | 1002 |  | Q86UR5 | 1051 |  | P07686 | 1100 |  | Q13823 | 1149 |  | P50213 |
| 905 |              | P06313 | 954 |  | Q9Y2W1 | 1003 |  | P01778 | 1052 |  | P08575 | 1101 |  | Q32P28 | 1150 |  | Q5JTD7 |
| 906 |              | P01601 | 955 |  | P01762 | 1004 |  | Q29980 | 1053 |  | P17020 | 1102 |  | Q9P2D0 | 1151 |  | Q5T5M9 |
| 907 |              | P01743 | 956 |  | Q92793 | 1005 |  | Q8IYR0 | 1054 |  | P18065 | 1103 |  | A2RUS2 | 1152 |  | Q96NJ5 |

|      |  |        |      |  |        |      |  |        |      |  |        |      |  |        |      |  |        |
|------|--|--------|------|--|--------|------|--|--------|------|--|--------|------|--|--------|------|--|--------|
| 1153 |  | Q9HCM1 | 1164 |  | Q9UPV0 | 1175 |  | A6NJ16 | 1186 |  | Q3ZCV2 | 1197 |  | Q6IEE7 | 1208 |  | Q96PV6 |
| 1154 |  | A6NKC9 | 1165 |  | A6NIX2 | 1176 |  | O15409 | 1187 |  | Q6ZV70 | 1198 |  | O60245 | 1209 |  | Q9BXW9 |
| 1155 |  | Q6ZVL6 | 1166 |  | Q92618 | 1177 |  | O43353 | 1188 |  | Q86YW5 | 1199 |  | A6H8M9 | 1210 |  | Q9NVS9 |
| 1156 |  | Q8IZU1 | 1167 |  | Q12770 | 1178 |  | P01610 | 1189 |  | Q8NHP7 | 1200 |  | Q13496 |      |  |        |
| 1157 |  | Q96PF1 | 1168 |  | Q49AM3 | 1179 |  | P01742 | 1190 |  | Q9H013 | 1201 |  | Q8IVS2 |      |  |        |
| 1158 |  | Q9BYV8 | 1169 |  | O60333 | 1180 |  | P01918 | 1191 |  | Q9H165 | 1202 |  | Q8N2U0 |      |  |        |
| 1159 |  | Q9H8S5 | 1170 |  | P01763 | 1181 |  | P09067 | 1192 |  | Q9NWT6 | 1203 |  | Q92562 |      |  |        |
| 1160 |  | Q9NRK6 | 1171 |  | P08572 | 1182 |  | P31942 | 1193 |  | Q9UDY8 | 1204 |  | Q96QF7 |      |  |        |
| 1161 |  | Q9H2X9 | 1172 |  | Q14739 | 1183 |  | P46781 | 1194 |  | P51825 | 1205 |  | Q9NZP6 |      |  |        |
| 1162 |  | Q8TDM6 | 1173 |  | Q6P4E1 | 1184 |  | Q13530 | 1195 |  | P42224 | 1206 |  | O43182 |      |  |        |
| 1163 |  | P19174 | 1174 |  | Q96FV2 | 1185 |  | Q13641 | 1196 |  | Q5T5P2 | 1207 |  | Q8N7X4 |      |  |        |

**Supplemental Material, Table 2.** List of FDA-approved biomarker proteins for adult plasma analytics (Anderson 2010) that also were observed in this study in UCB serum.

| UniProt Accession | Protein name brief | Protein Name                            | CPT from Ref. labs* | KEGG pathway number                      |
|-------------------|--------------------|-----------------------------------------|---------------------|------------------------------------------|
| P02768            | ALBU               | Albumin                                 | 82040               |                                          |
| P02763            | A1AG1              | Alpha-1-Acid Glycoprotein (Orosomuroid) | 82985               |                                          |
| P19652            | A1AG2              | Alpha-1-Acid Glycoprotein (Orosomuroid) | 82985               |                                          |
| P01009            | SERPINA1           | Alpha-1-Antitrypsin                     | 82103               | 04610                                    |
| P08697            | SERPINF2           | Alpha-2-Antiplasmin                     | 85410               | 04610                                    |
| P02765            | FETUA              | Alpha-2-HS-Glycoprotein                 |                     |                                          |
| P01023            | A2M                | Alpha-2-Macroglobulin                   | 83883               | 04610                                    |
| P02771            | FETA               | Alpha-Fetoprotein - Tumor Marker        | 82105               |                                          |
| P01008            | SERPINC1           | Antithrombin III                        | 85301               | 04610                                    |
| P02647            | APOA1              | Apolipoprotein A1                       | 82172               | 03320                                    |
| P04114            | APOB               | Apolipoprotein B                        | 82172               |                                          |
| P02775            | PPBP               | Beta-Thromboglobulin                    |                     | 04062, 04060                             |
| P00450            | CP                 | Ceruloplasmin                           | 82390               | 00860                                    |
| P09871            | C1S                | Complement C1                           | 86161               | 04610, 05322, 05150                      |
| P00736            | C1R                | Complement C1                           | 86161               | 04610, 05322, 05150                      |
| P05155            | SERPING1           | Complement C1 Inhibitor                 | 86160               | 04610                                    |
| P01024            | C3                 | Complement C3                           | 86160               | 04610, 05322, 05150                      |
| POCOL4            | C4A                | Complement C4                           | 86160               | 04610, 05322, 05150                      |
| P01031            | C5                 | Complement C5                           | 86160               | 04610, 05322, 05150                      |
| P01034            | CYTC               | Cystatin C                              | 82610               | 04970                                    |
| P00742            | F10                | Factor X                                | 85260               | 04610                                    |
| Q96PQ8            | F7                 | Factor VII                              | 85230               | 04610                                    |
| P05160            | F13B               | Factor XIII                             | 85290               | 04610                                    |
| P02671            | FIBA               | Fibrinogen                              | 85385               | 04610                                    |
| P02751            | FN1                | Fibronectin                             |                     | 05100, 04810, 05200, 04512, 04510, 05146 |
| P00738            |                    | Haptoglobin                             | 83010               |                                          |
| P02790            | HEMO               | Hemopexin                               |                     |                                          |
| Q5EK51            |                    | Lactoferrin                             |                     |                                          |
| P08519            | APOA               | Lipoprotein(a) (Lp(a))                  | 83695               |                                          |
| P00747            | PLG                | Plasminogen                             | 85421               | 04610, 05150, 04080                      |
| P02766            | TTHY               | Prealbumin                              | 84134               |                                          |
| P00751            | CFB                | Properdin factor B                      | 83883               | 04610, 05150                             |
| P07225            | PROS1              | Protein S                               | 85305               | 04610                                    |
| P02753            | RET4               | Retinol binding protein (RBP)           | 83883               |                                          |
| P05543            | THBG               | Thyroxine Binding Globulin (TBG)        | 84442               |                                          |
| P02787            | TRFE               | Transferrin                             | 84466               |                                          |
| P02786            | TFRC               | Transferrin Receptor (TFR)              | 84238               | 04144, 04640, 04145                      |
| P04275            | VWF                | Von Willebrand Factor                   | 85246               | 04610, 04512, 04510                      |

\* CPT were extracted.



## **References**

Anderson N.L. 2010. The clinical plasma proteome: a survey of clinical assays for proteins in plasma and serum. *Clin Chem* 56:177-185.
